# Supplementary material
Source: PubMed Central journal article supplement (PMC8717666)
Supplement: 13012_2021_1174_MOESM4_ESM.pdf [file 13012_2021_1174_MOESM4_ESM.pdf]

Scholl\*, Hahlweg\* et al. Evaluation of a program for routine implementation of shared decision-making in cancer care: results of a stepped wedge cluster randomized trial.

#### Additional file 4. Sensitivity analyses.

|                                        | Original analysis        | Sensitivity analyses      |                           |                                |                                |                            |                          |
|----------------------------------------|--------------------------|---------------------------|---------------------------|--------------------------------|--------------------------------|----------------------------|--------------------------|
|                                        |                          | Full covariate analysis   | Categorical time analysis | Multiplicative effect analysis | Heterogeneous effects analysis | Repeated measures analysis | Per protocol analysis    |
|                                        | PE (95% CI)              | PE (95% CI)               | PE (95% CI)               | PE (95% CI)                    | PE (95% CI)                    | PE (95% CI)                | PE (95% CI)              |
| <i>Patient survey measures</i>         |                          |                           |                           |                                |                                |                            |                          |
| Uptake of SDM (SDM-Q-9)                | 0.56<br>(-3.97 to 5.09)  | 2.03<br>(-2.71 to 6.77)   | 1.14<br>(-3.48 to 5.77)   | 2.54<br>(-4.91 to 9.99)        | 0.56<br>(-3.97 to 5.09)        | N/A                        | 1.91<br>(-4.14 to 7.97)  |
| Uptake of SDM (CollaboRATE)            | 1.23<br>(-1.91 to 4.38)  | 2.56<br>(-0.82 to 5.95)   | 1.35<br>(-1.85 to 4.55)   | 2.06<br>(-3.16 to 7.27)        | 1.23<br>(-1.91 to 4.38)        | N/A                        | 2.46<br>(-1.92 to 6.83)  |
| Decision control (adapted CPS)         | 1.55*<br>(1.08 to 2.22)  | 1.68*<br>(1.13 to 2.50)   | 1.57*<br>(1.09 to 2.27)   | 1.72*<br>(1.01 to 2.94)        | 1.55*<br>(1.08 to 2.22)        | N/A                        | 1.60<br>(0.98 to 2.61)   |
| <i>HCP survey measures</i>             |                          |                           |                           |                                |                                |                            |                          |
| SDM knowledge                          | 1.58**<br>(0.61 to 2.54) | 1.75***<br>(0.87 to 2.63) | 1.62**<br>(0.65 to 2.59)  | 0.36<br>(-1.80 to 2.52)        | 1.55*<br>(0.34 to 2.77)        | 2.63***<br>(1.99 to 3.26)  | 1.63**<br>(0.58 to 2.69) |
| SDM uptake                             | 0.37<br>(-0.46 to 1.21)  | 0.38<br>(-0.41 to 1.18)   | 0.35<br>(-0.48 to 1.19)   | 0.72<br>(-1.11 to 2.54)        | 0.27<br>(-1.19 to 1.73)        | 0.92**<br>(0.39 to 1.45)   | 0.62<br>(-0.31 to 1.54)  |
| Organizational readiness (ORIC)        | -0.04<br>(-0.25 to 0.21) | -0.04<br>(-0.25 to 1.18)  | -0.04<br>(-0.25 to 0.18)  | -0.28<br>(-0.74 to 0.19)       | -0.04<br>(-0.41 to 0.32)       | 0.06<br>(-0.08 to 0.19)    | 0.07<br>(-0.17 to 0.30)  |
| <i>Observer-rated audio-recordings</i> |                          |                           |                           |                                |                                |                            |                          |
| Uptake of SDM (OPTION <sup>5</sup> )   | -0.35<br>(-8.26 to 7.75) | 0.07<br>(-9.55 to 9.69)   | -0.41<br>(-8.34 to 7.53)  | -1.27<br>(-18.3 to 15.76)      | -0.15<br>(-9.79 to 9.49)       | N/A                        | 3.54<br>(-6.54 to 13.61) |
| <i>Observation of MDTMs</i>            |                          |                           |                           |                                |                                |                            |                          |
| Information on patient view            | 1.17<br>(0.67 to 2.04)   | N/A                       | 1.23<br>(0.69 to 2.17)    | 0.64<br>(0.21 to 1.97)         | 1.17<br>(0.67 to 2.04)         | N/A                        | 1.17<br>(0.68 to 2.01)   |

Notes. PE = parameter estimate; CI = confidence interval; SDM = shared decision-making; CPS = Control Preference Scale; HCP = health care professional; ORIC = Organizational Readiness for Implementing Change; MDTM = multidisciplinary team meeting; \* P< 05; \*\* P<.01; \*\*\* P<.001.
