# Supplementary material
Source: PubMed Central journal article supplement (PMC8717666)
Supplement: 13012_2021_1174_MOESM5_ESM.pdf [file 13012_2021_1174_MOESM5_ESM.pdf]

Scholl\*, Hahlweg\* et al. Evaluation of a program for routine implementation of shared decision-making in cancer care: results of a stepped wedge cluster randomized trial.

### Additional file 5. Reach and further implementation indicators.

|                                                                         | Department 1   | Department 2   | Department 3 | Total           |
|-------------------------------------------------------------------------|----------------|----------------|--------------|-----------------|
| <b>SDM training for HCPs</b>                                            |                |                |              |                 |
| <i>Eligible, n</i>                                                      |                |                |              |                 |
| Physicians                                                              | 67             | 25             | 26           | 118             |
| Nurses                                                                  | 153            | 60             | 61           | 274             |
| Total                                                                   | 220            | 85             | 87           | 392             |
| <i>Attending, n (% of eligible)</i>                                     |                |                |              |                 |
| Physicians                                                              | 28 (41.8)      | 20 (80.0)      | 13 (50.0)    | 61 (51.7)       |
| Nurses                                                                  | 50 (32.7)      | 42 (70.0)      | 20 (32.8)    | 112 (40.9)      |
| Total                                                                   | 78 (35.4)      | 62 (72.9)      | 33 (37.9)    | 173 (44.1)      |
| <b>Individual SDM coaching of physicians</b>                            |                |                |              |                 |
| <i>Eligible, n</i>                                                      |                |                |              |                 |
|                                                                         | 67             | 25             | 26           | 118             |
| <i>Attending, n (% of eligible)</i>                                     |                |                |              |                 |
| First coaching                                                          | 29 (43.3)      | 15 (60.0)      | 13 (50.0)    | 57 (48.3)       |
| Second coaching                                                         | 19 (28.4)      | 8 (32.0)       | 10 (38.5)    | 37 (31.4)       |
| <i>Observed encounters per coaching, mean (range)</i>                   | 4.0 (1-10)     | 3.7 (1-10)     | 3.0 (1-7)    | 3.7 (1-10)      |
| <i>Weeks between training and first coaching, mean (range)</i>          | 8.4 (0-42)     | 14.6 (3-49)    | 9.2 (2-20)   | 10.7 (0- 49)    |
| <i>Coaching without prior training, n (% of eligible)</i>               | 12 (41.4)      | 2 (13.3)       | 6 (46.2)     | 20 (35.1)       |
| <b>Patient activation intervention: Ask 3 Questions</b>                 |                |                |              |                 |
| <i>Distributed postcards, n</i>                                         | 1,188          | 943            | 578          | 2,709           |
| <i>Distributed posters, n</i>                                           | 47             | 59             | 30           | 136             |
| <b>Provision of information material and decision aids for patients</b> |                |                |              |                 |
| <i>Distributed brochures "Patients and physicians as partners", n</i>   | 485            | 126            | 151          | 762             |
| <i>Distributed Ottawa Personal Decision Guides, n</i>                   | 179            | 92             | 99           | 370             |
| <b>Revision of quality management documents</b>                         |                |                |              |                 |
| <i>Number of revised documents, n</i>                                   | 3              | 2              | 8            | 13 <sup>a</sup> |
| <b>Reflection on multidisciplinary team meetings</b>                    |                |                |              |                 |
| <i>Number of meetings, n</i>                                            | 3 <sup>b</sup> | 2 <sup>b</sup> | 1            | 5 <sup>b</sup>  |

Notes: n = number; <sup>a</sup> Additionally one new stand-alone quality management document on SDM was developed; <sup>b</sup> One meeting was a joint meeting between clinics 1 and 2.
